# Supplementary material for: Inhibition of Autophagy Promotes Salinomycin-Induced Apoptosis via Reactive Oxygen Species-Mediated PI3K/AKT/mTOR and ERK/p38 MAPK-Dependent Signaling in Human Prostate Cancer Cells
Source: MDPI journal article supplement (doi:10.3390/ijms18051088), 2017-05-18
Supplement: s1 [file s1]

# Inhibition of Autophagy Promotes Salinomycin-Induced Apoptosis via Reactive Oxygen Species-Mediated PI3K/AKT/mTOR and ERK/p38 MAPK-Dependent Signaling in Human Prostate Cancer Cells

Kwang-Youn Kim<sup>1,2†</sup>, Kwang-Il Park<sup>3†</sup>, Sang-Hun Kim<sup>2</sup>, Sun-Nyoung Yu<sup>2</sup>, Sul-Gi Park<sup>2</sup>, Young Woo Kim<sup>1</sup>, Young-Kyo Seo<sup>4</sup>, Jin-Yeul Ma<sup>3</sup>, Soon-Cheol Ahn<sup>2,5\*</sup>

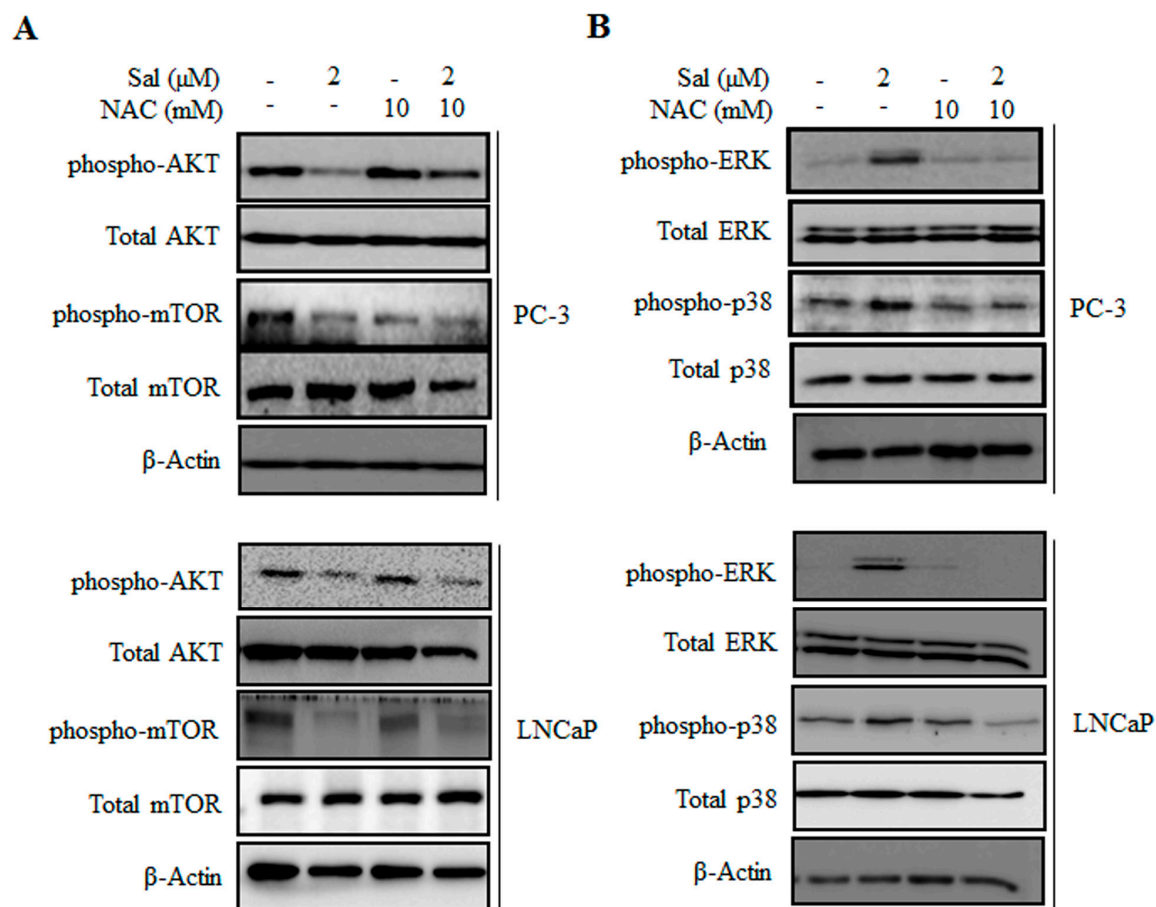

**Supplementary Figure S1.** ROS production regulates the PI3K/AKT/mTOR and ERK and p38 MAPK pathways. **(A)** Effects of NAC on AKT/mTOR protein expression; **(B)** Effects of NAC on ERK and p38 MAPK protein expression. Cells were pretreated with 10 mM NAC for 1 h, and then the proteins were detected by western blot analysis. All data are representative of at least three independent experiments. Data are shown as the mean  $\pm$  SD. \*  $p < 0.05$ .
